# Supplementary material for: Adsorptive removal of organic dyes from aqueous solution by a Zr-based metal–organic framework: effects of Ce(iii) doping
Source: Royal Society of Chemistry journal article supplement (doi:10.1039/c8dt00217g), 2018-01-01
Supplement: c8dt00217g1.pdf [file c8dt00217g1.pdf]

## *Electronic Supplementary Information (ESI)*

### **Adsorptive removal of organic dyes from aqueous solution by a Zr-based metal-organic framework: Effects of Ce(III) doping**

Ji-Min Yang, <sup>\*a</sup> Rong- Jian Ying, <sup>\*a</sup> Chun-Xiang Han, <sup>a</sup> Qi-Tu Hu, <sup>a</sup> Hui-Min Xu, <sup>a</sup> Jian-Hui Li, <sup>a</sup> Qiang Wang, <sup>\*b</sup> and Wei Zhang <sup>\*a</sup>

<sup>a</sup>*School of Chemistry & Chemical Engineering, Linyi University, Linyi 276005, P.R. China*

<sup>b</sup>*Laboratory for Micro-sized Functional Materials & College of Elementary Education and Department of Chemistry, Capital Normal University, Beijing, 100048, P.R. China*

Tel.: +86 539 7258620; fax: +86 539 7258620; e-mail: yangjimin@lyu.edu.cn; yingrongjian@lyu.edu.cn; qwchem@gmail.com zhangweiqust@126.com

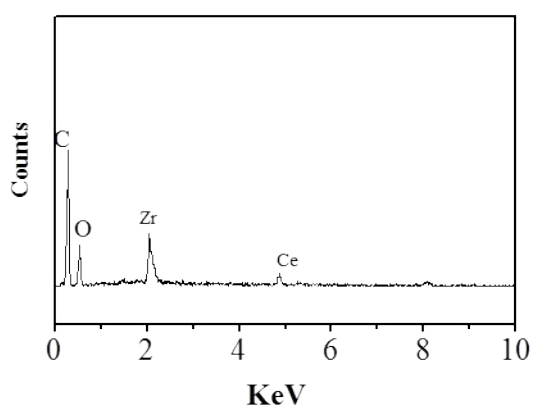

**Fig. S1** EDS spectra of Ce(III)-doped UiO-66.

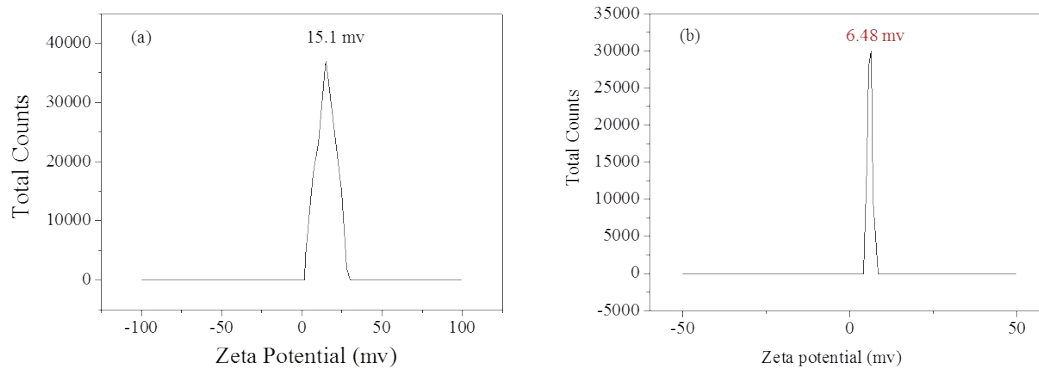

**Fig. S2** Zeta potential of different nanoparticles directly dispersed in water: (a) UiO-66 and (b) Ce(III)-doped UiO-66.

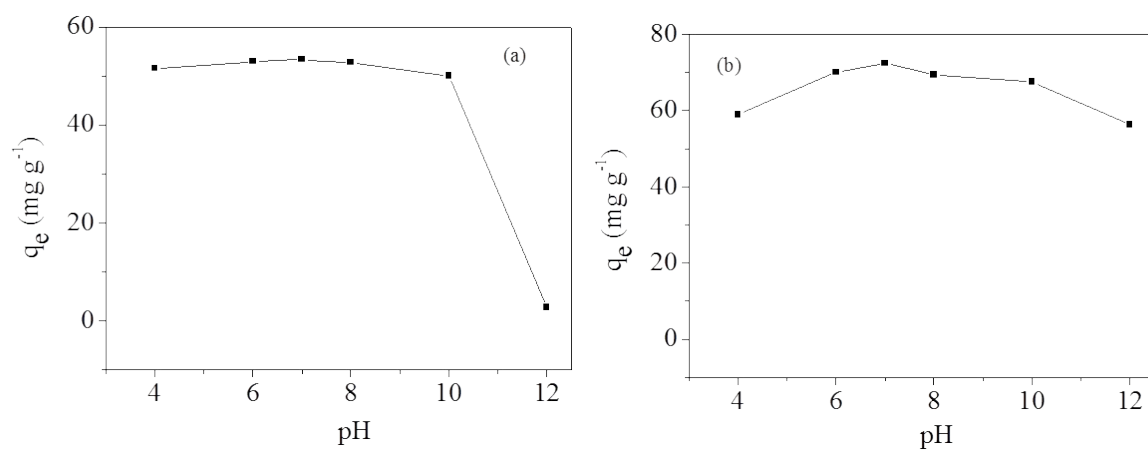

**Fig. S3** Effect of pH on dye adsorption on the Ce(III)-doped UiO-66 nanocrystals: (a) MB and (b) MO.

**Table S1** Summary of MB maximum adsorption capacities ( $q$ ) on various adsorbents.

| Type of adsorbent                     | $q$ (mg g <sup>-1</sup> ) | Reference |
|---------------------------------------|---------------------------|-----------|
| Ce(III)-doped UiO-66                  | 145.1                     | This work |
| UiO-66-P composite                    | 91.1                      | 13        |
| PZS nanotubes                         | 69.2                      | 34        |
| FMA <sub>s</sub>                      | 40                        | 35        |
| CS-MCM                                | 31.8                      | 36        |
| Fe <sub>3</sub> O <sub>4</sub> @ZIF-8 | 20.2                      | 37        |
| HKUST-1                               | 15.3                      | 14        |

**Table S2** Summary of MO maximum adsorption capacities ( $q$ ) on various adsorbents.

| Type of adsorbent                       | $q$ (mg g <sup>-1</sup> ) | Reference |
|-----------------------------------------|---------------------------|-----------|
| Ce(III)-doped UiO-66                    | 639.6                     | This work |
| MOF-235                                 | 477                       | 15        |
| MIL-100(Cr)                             | 211                       | 16        |
| NMC-3-600                               | 170.1                     | 44        |
| AC/ferrospinel composite                | 95.8                      | 45        |
| Acrylic acid grafted Ficus carica fiber | 51.55                     | 46        |
| Functionalized CNTs loaded TiO          | 42.85                     | 47        |

**Table S3** Summary of CR maximum adsorption capacities ( $q$ ) on various adsorbents.

| Type of adsorbent                                                  | $q$ (mg g <sup>-1</sup> ) | Reference |
|--------------------------------------------------------------------|---------------------------|-----------|
| Ce(III)-doped UiO-66                                               | 825.7                     | This work |
| In-based ICP hierarchical architectures                            | 577                       | 37        |
| Hierarchical hollow NiO                                            | 440                       | 39        |
| $\alpha$ -FeOOH                                                    | 275                       | 40        |
| Activated carbon                                                   | 200                       | 41        |
| Graphene oxide/chitosan/silica fibers                              | 120                       | 42        |
| Fe <sub>3</sub> O <sub>4</sub> @mTiO <sub>2</sub> @GO microspheres | 89.5                      | 43        |

**Table S4** Characteristic parameters of the adsorption of dyes on the Ce(III)-doped UiO-66 nanostructures.

|                        |                    | parameters                                                       | CR                                | MB     | MO                   | AC                    |        |        |
|------------------------|--------------------|------------------------------------------------------------------|-----------------------------------|--------|----------------------|-----------------------|--------|--------|
| Adsorption kinetics    | Pseudo-first-order | $q_{e,Exp}$ (mg g <sup>-1</sup> )                                | 94.3                              | 72.4   | 53.4                 | 92.5                  |        |        |
|                        |                    | $q_{e,Cal}$ (mg g <sup>-1</sup> )                                | 20.1                              | 47.5   | 22.1                 | 56.6                  |        |        |
|                        |                    | $k_1$ (min <sup>-1</sup> )                                       | 0.0078                            | 0.0083 | 0.00507              | 0.0121                |        |        |
|                        |                    | $R^2$                                                            | 0.9234                            | 0.9599 | 0.9898               | 0.9890                |        |        |
| Pseudo-second-order    |                    | $q_{e,Exp}$ (mg g <sup>-1</sup> )                                | 94.3                              | 72.4   | 53.4                 | 92.5                  |        |        |
|                        |                    | $q_{e,Cal}$ (mg g <sup>-1</sup> )                                | 83.1                              | 48.2   | 54.4                 | 72.6                  |        |        |
|                        |                    | $k_2$ (g mg <sup>-1</sup> min <sup>-1</sup> )                    | 0.0116                            | 0.0207 | 0.0184               | 0.0138                |        |        |
|                        |                    | $R^2$                                                            | 0.9999                            | 0.9984 | 0.9995               | 0.9965                |        |        |
| Adsorption isotherm    | Tempkin            | $A$ (L g <sup>-1</sup> )                                         | 2.64                              | 28.41  | Low content<br>0.298 | High content<br>0.028 | 16.22  |        |
|                        |                    | $B$                                                              | 127.9                             | 16.1   | 52.98                | 264.6                 | 28.1   |        |
|                        |                    | $R^2$                                                            | 0.9945                            | 0.9609 | 0.9981               | 0.9834                | 0.9887 |        |
|                        | Freundlich         | $n$                                                              | 2.96                              | 2.70   | 1.81                 | 1.63                  | 5.65   |        |
|                        |                    | $k_F$ (mg g <sup>-1</sup> (L mg <sup>-1</sup> ) <sup>1/n</sup> ) | 143.6                             | 62.6   | 16.3                 | 10.2                  | 86.7   |        |
|                        |                    | $R^2$                                                            | 0.9639                            | 0.9411 | 0.9883               | 0.9973                | 0.9922 |        |
|                        | Langmuir           |                                                                  | $q_{m,Exp}$ (mg g <sup>-1</sup> ) | 826.7  | 145.3                | 276.9                 | 639.6  | 245.4  |
|                        |                    |                                                                  | $q_{m,Cal}$ (mg g <sup>-1</sup> ) | 854.7  | 147.3                | 227.6                 | 2041.3 | 250.6  |
|                        |                    |                                                                  | $b$ (L mg <sup>-1</sup> )         | 0.0986 | 0.1313               | 0.0342                | 0.0018 | 0.0680 |
|                        |                    |                                                                  | $R^2$                             | 0.9994 | 0.9999               | 0.9998                | 0.9739 | 0.9991 |
| Thermodynamic constant |                    | $\Delta G$ (kJ mol <sup>-1</sup> )                               | -5.7                              | -5.0   | -8.4                 | -15.7                 | -6.7   |        |

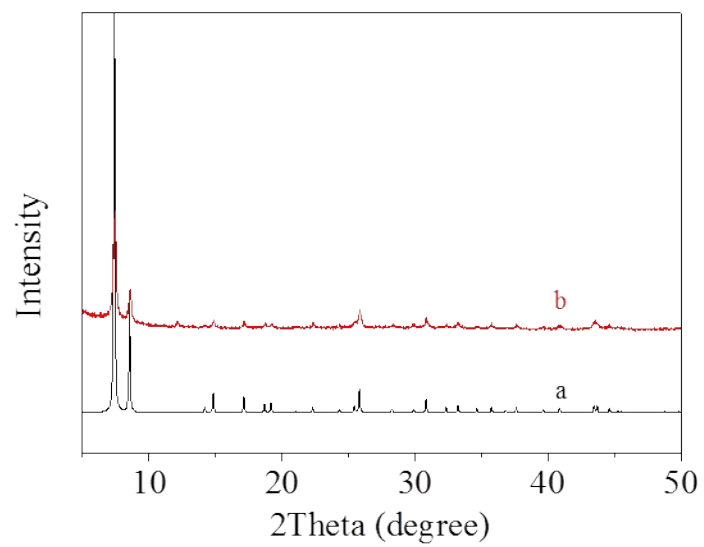

**Fig. S4** PXRD patterns of (a) simulation and (b)Ce(III)-doped UiO-66@CR composites



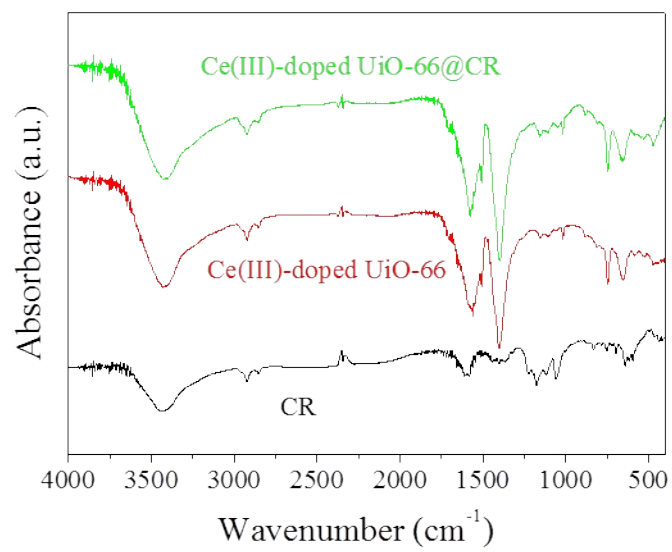

**Fig.S5** FT-IR spectra of CR, Ce(III)-doped UiO-66 and Ce(III)-doped UiO-66@CR composites

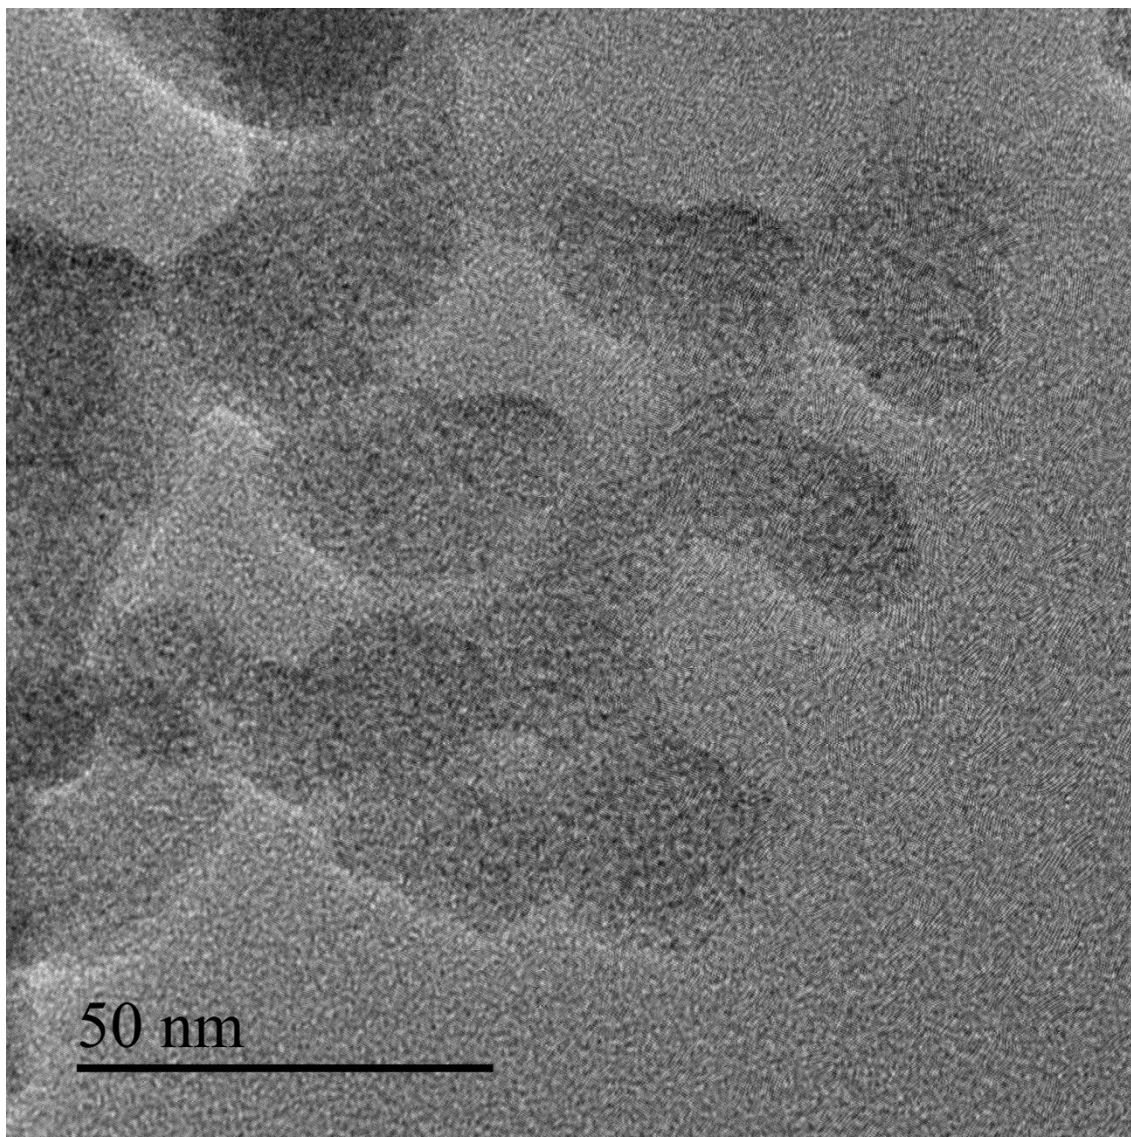

Fig. S6 TEM images of Ce(III)-doped UiO-66@CR composites.

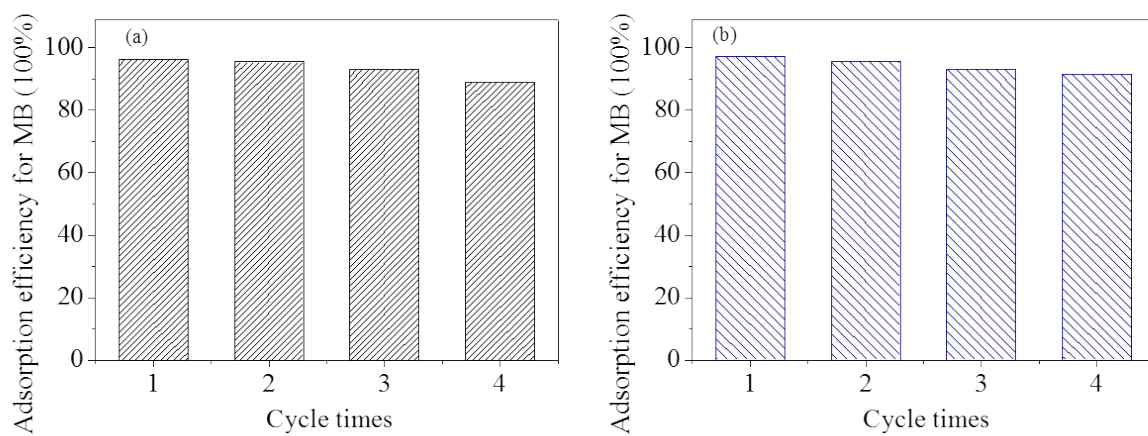

**Fig. S7** Recycle of the removal efficiency of (a) Ce(III)-doped UiO-66 for MB and (b) Ce(III)-doped UiO-66 for MO.
